# Supplementary material for: Poly(ADP-ribosyl)ation of heterogeneous nuclear ribonucleoproteins modulates splicing
Source: PubMed Central journal article supplement — Nucleic Acids Res. 2009 Apr 3;37(11):3501–13. doi: 10.1093/nar/gkp218 (PMC2699505; doi:10.1093/nar/gkp218), 2009-04-03
Supplement: gkp218_1.pdf [file gkp218_1.pdf]

SUPPORTING ONLINE MATERIAL FOR

**Poly(ADP-ribose) Binding to Heterogeneous Nuclear Ribonucleoproteins Modulates  
Alternative Splicing Activity**

Yingbiao Ji and Alexei V. Tulin

**This PDF file includes:**

Figures 1 to 8.

**Figure 1.** The expression level of Squid/hrp40 is strongly reduced in the *Squidhrp40* mutant, indicating the specificity of the Squid/hrp40 antibody (8D2). **A.** 10  $\mu$ g total proteins from the third-instar larvae of the homozygous *Squid/hrp40* mutant (*sqd<sup>j6E3</sup>*) and the wild-type (y,w) fly was immunoblotted with the Squid/hrp40 antibody (8D2). The residual Squid/hrp40 present in the *Squid/hrp40* mutant came from the maternal expression of the *Squid/hrp40* gene. **B.** The same blot as in (A) was stripped and probed with mouse anti-alpha-tubulin (Sigma) to show the equal loading.

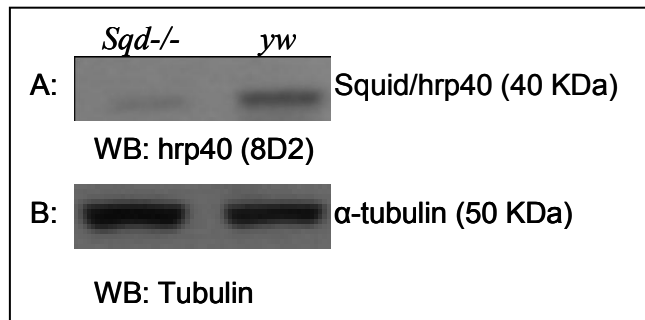

**Figure 2.** The transcript structure and expression of the *hrp38*:GFP fusion gene.

**A.** The transcript structure of the *Hrb98DE/hrp38* gene.

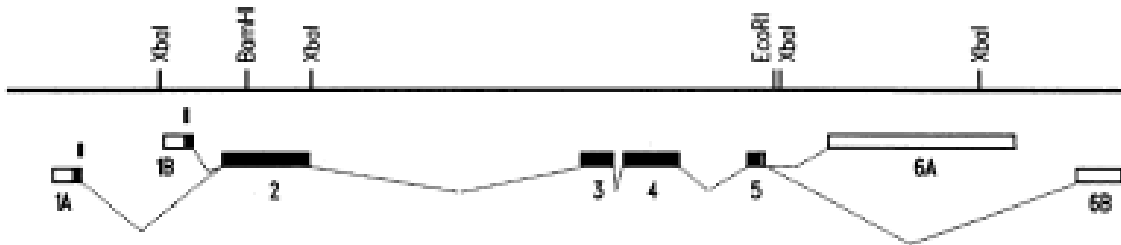

**B.** *Hrb98DE/hrp38*:GFP fusion gene.

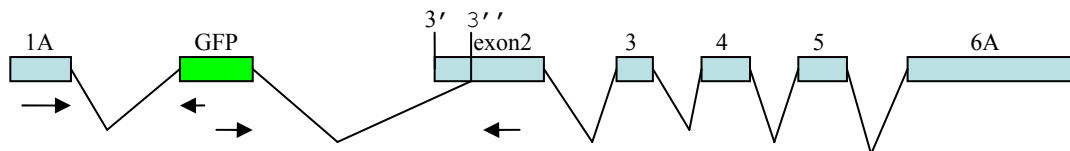

GFP was inserted between the exon1A and exon2 of the *Hrb98DE/hrp38* gene. Sequencing the RT-PCR products using indicated primers (arrow) showed that GFP was also spliced in-frame to exon1A and exon2 using the 3'-most (3'') splice site, producing the *Hrb98DE-PE*:GFP

**C.** The amino acid sequence of *Hrp38-PE*:GFP fusion protein:

```

MGGHDNWNNGQNEEQD IHHHHHHGVSKGEELFTGVVPILEVELDGDVNGHKFSVSGEGEGDATYGLTLKFI
CTTGKLPVPWPTLVTTLTLYGVQCFSRYPDHMKQHDFFKSAMPEGYVQERTIFFKDDGNYKTRAEVKFEGDT
LVNRIELKGI DFKEDGNILGHKLEYNYNSHNVIYIMADKQKNGIKVNFKIRHNIEDGSVQLAHYQONTPIGD
GPVLLPDNHYLSTQSALS KDPNEKRDMVLLFVTAAGITLGMDELYKSTLEDSITEPEHMRKLFIGGLDY
RTTDENLKAHFEKWNIVDVVVMKDPRTKR SRGFGFITYSHSSMIDEAQKSRPHKIDGRVVEPKRAVPRQD
IDSPNAGATVKKLFV GALKDDHDEQSIRDYFQHFGNIVDINIVIDKETGKKRGFAFVEFDDYDPVDKVV LQ
KQHQLNGKMVDVKKALPKQNDQGGGGGRGGPGGRAGGNRGNMGGGNYGNQNGGGNWNNGGNNWGNNRGGN
DNWGNNSFGGGGGGGGGYGGGNSWGNPNPDWNGGGNFGGGNNWNNGGNDFFGGYQQNYGGGPQRGGGN
FNNNRMQPYQGGGGFKAGGGNQGNYGNNQGFNNGGNNRRY.
    
```

The amino acid sequence of *hrp38-PE*:GFP fusion protein was derived from the RT-PCR sequences obtained in Figure B and the *hrp38-PE* sequence in the flybase. The 6X His-GFP insertion is highlighted in green. The pADPr-binding motif is highlighted in yellow. Based on our sequences, it appears that the pPGC construct (ATC-6XHis-GFP-TCGACACTCGAG) (Morin *et al.*, 2001) was inserted into the intron between exon 1A and exon 2 of the *Hrb98DE/hrp38* gene in the *ZCL588* strain.

**D.** The expression of hrp38:GFP fusion protein. Upper panel: 50 µg total proteins from the third-instar larvae of the indicated genotypes was subjected to immunoblotting analysis using anti-GFP antibody, showing that about 55 kDa hrp38:GFP fusion protein was detected from the *ZCL588* (hrp38:GFP) and *PARP1-DsRed; hrp38:GFP* fly strains, respectively, but not from the wild-type strain (*yw*). Lower panel: The same blot as shown in the upper panel was stripped and probed with the mouse actin antibody (Millipore) as the loading control. It appears that the *ZCL588* (hrp38:GFP) strain had an expression level equal to the hrp38:GFP fusion protein with the *PARP1-DsRed; hrp38:GFP* strain after normalization with the loading control.

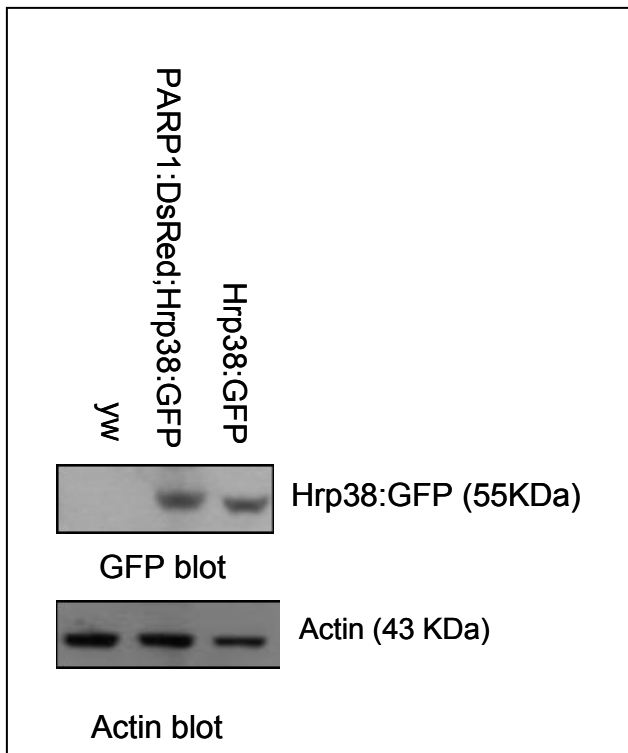

**Figure 3.**

**A.** The accumulation of hrp38:GFP in the 93D puffs after heat-shock treatment.

*Drosophila* polytene chromosomes of the hrp38:GFP line were immunostained with the anti-GFP antibody: Hrp38:GFP, green; DNA, red.

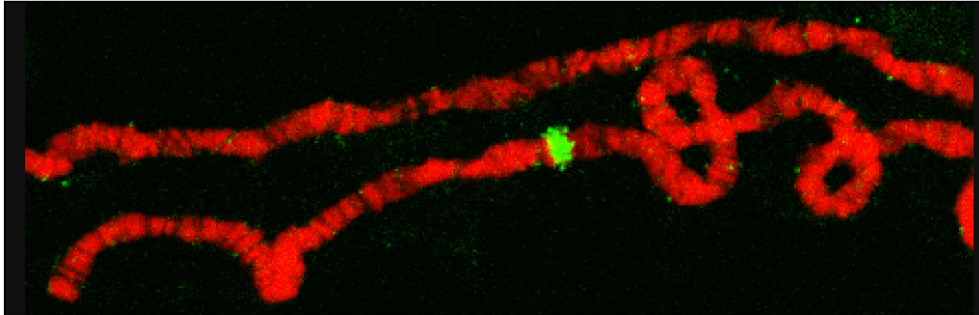

**B.** There is no significant difference in the expression levels of hrp38:GFP and Squid between the hrp38:GFP and *Parg*; hrp38:GFP lines after heat-shock treatment. After one hour of heat-shock treatment, 30  $\mu$ g total proteins from the third-instar larvae of the hrp38:GFP and *Parg*; hrp38:GFP lines was immunoblotted with anti-GFP and anti-Squid antibody (8D2), respectively. The blot was stripped and probed with mouse anti-actin antibody for loading control. HS: heat-shock treatment.

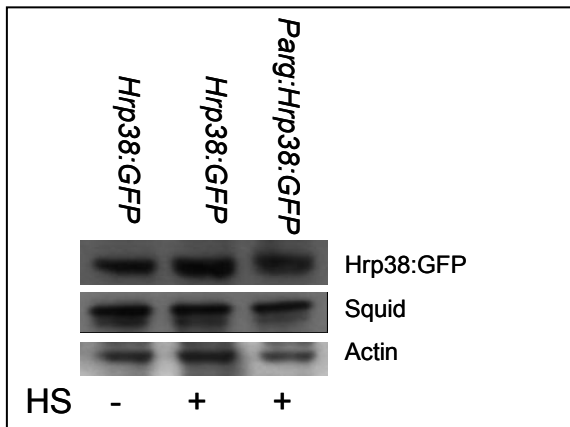

**Figure 4.**

**A.** RT-PCR confirmed the genotypes for the real-time RT-PCR assay in Figure 8B in the main text and Figure 4B in the Supplemental Materials. Lane 1. *Parg* (-/-), the third-instar larvae male; 2. *yw*, the third-instar larvae male (control); 3. *Parg* (+/-), the third-instar female; 4. *Parg* (-/-), pharate male; 5. *yw* pharate male (control).

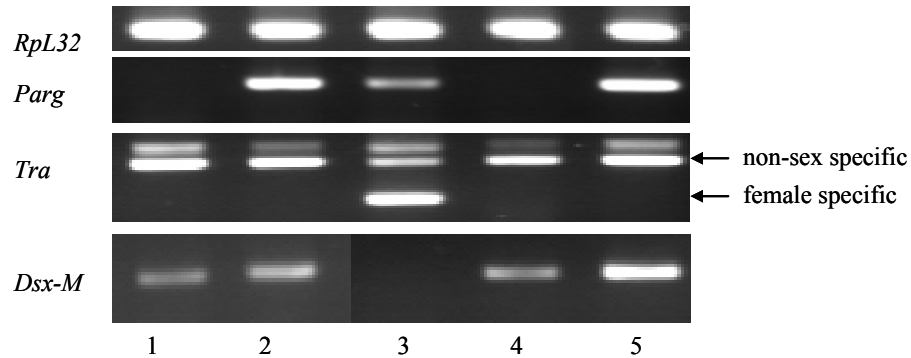

**B.** There is no significant difference in the *RpL32* expression level relative to the wild type among the indicated genotypes and treatment in Figure 7C in the main text. The *RpL32* expression level as an internal control in Figure 8B was measured by real-time RT-PCR. The error bar represents the standard deviation from two independent experiments. Lane 1. *Parg* (-/-), the third-instar larvae male; 2. *yw*, the third-instar larvae male (control); 3. *Parg* (+/-), the third-instar female; 4. *Parg* (-/-), pharate male; 5. *yw* pharate male (control).

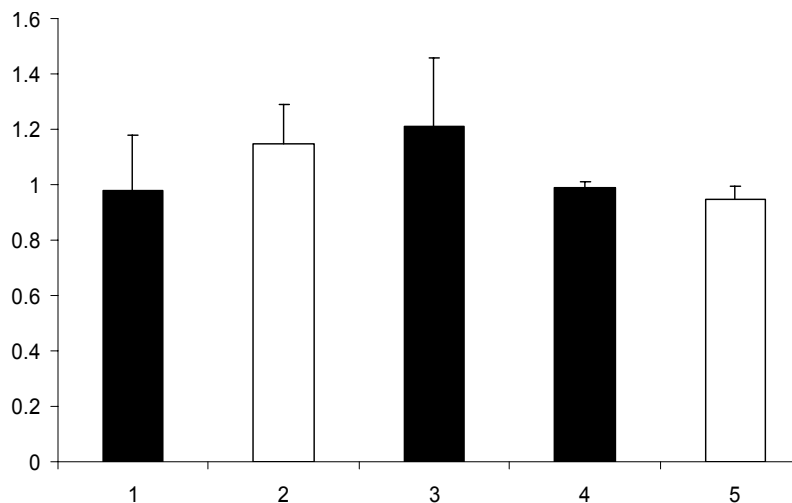

**Figure 5.** Inhibition of alternative splicing of the *dsx* gene by PARG loss-of-function.

**A.** The structures of *dsx* pre-mRNA (unspliced) and *dsx*-male (spliced) transcripts in the *doublesex* (*dsx*) locus. The primers (arrows) specific for the *dsx*-male transcript were used for *dsx*-male quantification. **B.** The *dsx*-male expression level relative to *RpL32* in the indicated genotypes measured by real-time RT-PCR. The error bar represents the standard deviation from two independent experiments. Lane 1. *Parg* (-/-), the third-instar larvae male; 2. *yw*, the third-instar larvae male (control); 3. *Parg* (+/-), the third-instar female; 4. *Parg* (-/-), pharate male; 5. *yw* pharate male (control). \*\*: P<0.01.

**A.**

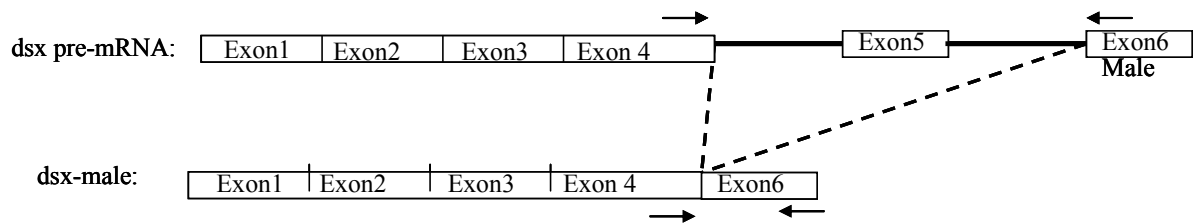

**B.**

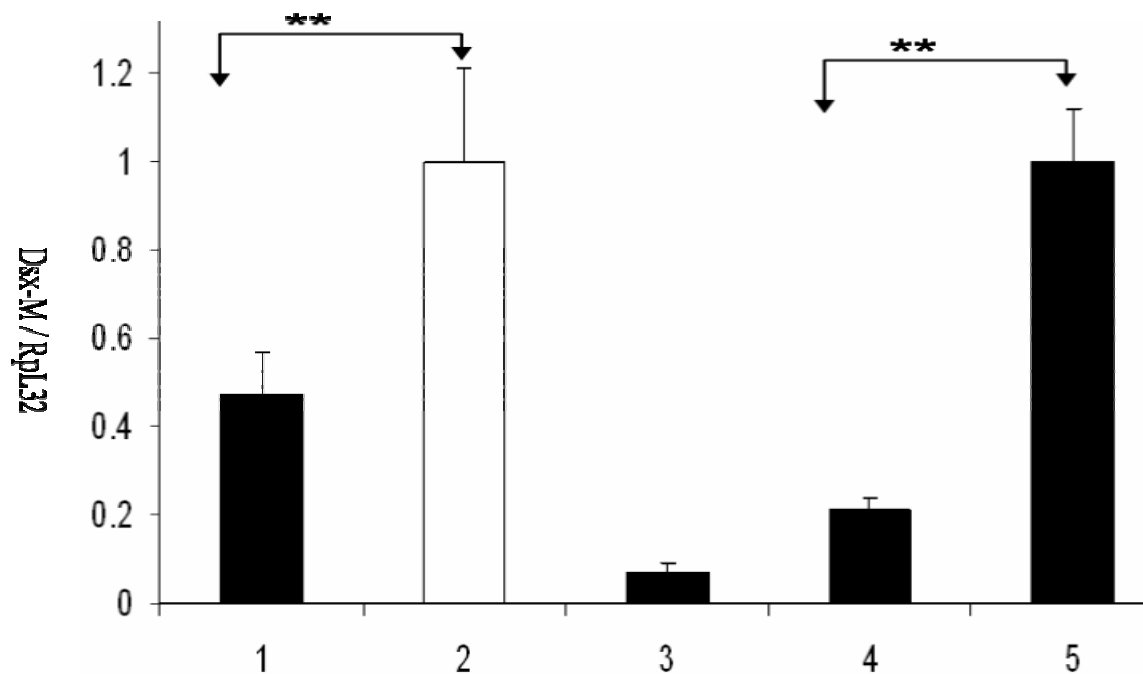

**Figure 6.** There is no significant difference in the *RpL32* expression level relative to the wild type among the indicated genotypes and treatment in Figure 8D in the main text. The error bar represents the standard deviation from two independent experiments. The expression level of the *RpL32* expression level as an internal control was measured by real-time RT-PCR.

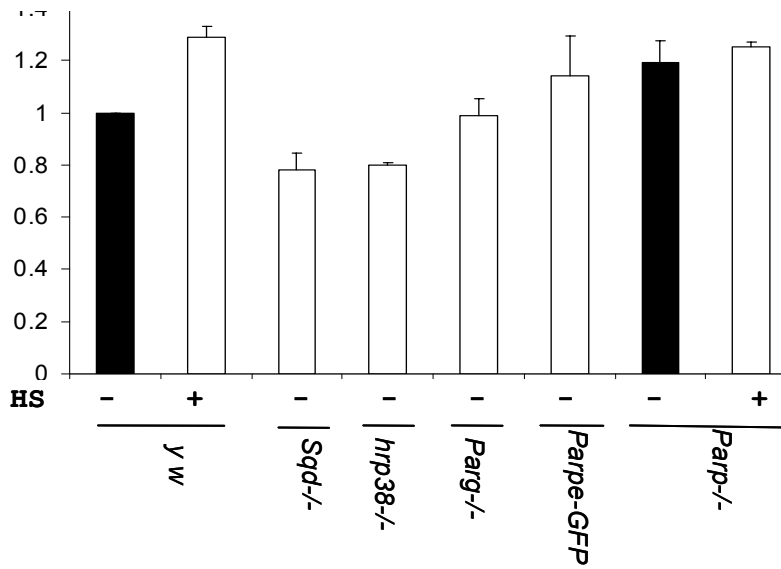



**Figure 7.** The structure of Hrsr-Omega-RC. Introns in lower case are marked in blue; G triple and quarters in exon 2 are marked in red.

```

1 ACTCTCAAAT GAAAAGTGTT CAAGTGCATT CAAAGTGAAG CTGAAAAAAT AACCAGTTAA
61 AAATAGTACA AAGAAATTTT CTTTCTTGCA ATTTGCAAGC AGTAGCTACA ACCAAAAATG
121 GAAAAGTGTA AAAATCGTGT CCCAGCAGAC GAGCAGCAGC AGTACGAGTA TTGCAAAATG
181 CAGGGGCAAG GGCCACGTA GTATTTTCC ACGTCGGGCA TTTAATGCTC TCGAGTTGGA
241 AACAAATGAAA CCATACGCAA ACCCCCTGGA AAAGATGTGA TTAGTCATCG ATTTTGCTGG
301 TCAGCGTCGG GGAATTCGC AATGCAGCAG GCAGTTTTCT CAAATTTGGC TAGAAAGTGA
361 CCCACTAGGC AGTCTGAGGC AGTTATCCAG GATGTAAGGA TGTGTGCAGT ACTCTCTGTG
421 TCGAATGGCG ATGGCCCTGA CCTGCGGATT TTGAAAGATT GAAATAGGAA GCCAGgtata
481 catacacagc aacgaatgca gcgtgttcta tattottaat tcgtaagcca aacctatggt
541 taagacgtag tttatataac cgtacatatg tatgtagcga aacacgtttt caaacgctcg
601 atcgaagcca tttcttctgc agccattgca atttcatcgt gttgcgtaat cgcaaattgt
661 aaatgtgtcc ctactacttc acatttgtgt gtatccaagt cgaaagtctt cgaactattc
721 tcgtgagcaa cccccgcatc gaaaggccac caactggctc gttctctctc tccagaaaca
781 gttactctt acgtttaca ttgactctct acctatcggg tatacacatt tttatatatg
841 tatacactca gagacacccc aatccccac catacatatg gcgagatggt tgaatgtatc
901 gcagttggac gaaaacggca gctgcgcaga aaacgctgcg gcgtacatac aaacgagctc
961 tttgtttgcc tttccccagt tttgcttccc catacgtata actggtgttt atcagcggta
1021 atctcgcag cctgactttg tccctgtcgc ttctattgac attctaaact agattgtaga
1081 cgttttaaca tttacctagc tgtaaatctt atttgtaaac atctctatat gcaacctgcc
1141 ataccactta accaagcaat atgtatttct ttctctaaac tttatagTTG GGCGTTGAAA
1201 GTTGATATCG ATATCGATCC GTGAAAAGTC GATACCCTGC GCAAGCATGG GGCGGCATAT
1261 GGGTGCTGAA AACGCACTCG GCCCGATCCC GATTGCAGCG TTATTCGAAA GCTGTGTCTG
1321 CGACCGTGAC TGAGATCATA TGCGTACATA TATCTAATGT CCGGGGTCGT AGGCCAGCCA
1381 GGGTGCTCGA TTCTGTCAGA TTGATTGTGC GGATTGTGTT ATAGGAACAC TGGTGTATCG
1441 ACTTCTCTGC TCCACTATGG GTGAAGGATA CCCTACCGAA AAGGCCTTCT GTCGCTTACT
1501 ATCATCGAAC AAGTCCGTA AAAGGCAGAC ATACGTACAC GTGGCAGCAT ATTACGTTCA
1561 ATGACACATC GTCTCTGGAT TAGTAGTTGA ACCAACGAGC TCGAATATAC CCTGCCAGTT
1621 GGTGTGAAAT ATTAATTTTG TTCTTATATT CAGTTGTAAA GTCAATACGG AAGACATTTT
1681 CACACCAACC ATGTGTCACT TATGTTCTTA AATACCAGAA ACTGTTTAAA TTTTTGTTCT
1741 TATACTTTC ACCAATTAAG AATTACCTGT ACTGATGTAA GTGTACCTGT TGAATCACAA
1801 CAAAAATAGA AAAAAATGAAT AACAAAAGAG CTCTATAACA GAAAAGCCAC AGAAAAAGTG
1861 AATAAAAATT CAAAAATTCA AAAAAATAAT TTCGAAACAT TT

```

**Figure 8.** The structure of the *Ddc* (*dopa decarboxylase*) gene. Introns in lower case are marked in blue; G triple and quarters in intron 1 and 2 are marked in red.

```

1 TCAGTTAAGA GGAGAACGCC AAGCGCACAG CAATCAGCAC CGAAATATCA GCATCGAAAT
61 ATCAGCAAAT AAATATTAGC TGTCTAAAC CAGGAGGGCA AACTGAACTT GGAGCAAAGA
121 TTTAGTTCGG AACGGAAGTA AAGCTCGGCA ACAAGTGCAA ACAATTAATA GCAGTTAACT
181 AAAGTGCAAC Ggtgagagac gaaagtgtgg ctccctcaaca gcctcagctg cctgaagtgc
241 ttggccaaca taatgagtgc atgtgcatgc gaaagattca ttccggggct aacgctgcgt
301 atacgtaatg tgtatctaaa actgggcata tactatagcc ttgcttcggt tcaatattgat
361 agttcgggcc ccgaattcta tagtgcttaa gcttttctcg gctttcggta tctgcatgct
421 tttgtgtatc tattaaaata agatttttagc tggcaacaag tcgtcgtctc aatgccaact
481 ttgttacggt gttaaaattg gaatttagaa aaaaaaaaaa aataaagcag tcttgattaa
541 tgcaagaatg cattaacat tctaattacc atactaattc acagcctata cttaagcagc
601 gcactcgatg ggaaaaacgct ttaaaactatt aataccttaa taccttatta ttataactat
661 tatcatcatc gttttgccta tcaagtaatt agtattcaat gtcgctcatt tgcctggttt
721 gcagcgatag cattttttgt ttgagctgct gcaactgatta gcaactatct caaaaacgca
781 cttctattaa taacactttc aataatcgca cattctttca tattagCTCT AACCATTCTGA
841 GTTCATATCA TTGCAAAAGT CAAACGAAAA GTAAATCTCT GAAATGAGCC ACATACCCAT
901 TAGTAACACA ATTCCAACAA AACAAACTGA TGGTAATGGT AAAGCTAACA TTTCGCCGGA
961 TAAGCTGGAT CCCAAGGTTT CGgtatgtct attgggttta ggtatagagc caacaattat
1021 gcacgtctga taaccaata cttttgcatc cacatcaaga TCGACATGGA GCGCCGGAG
1081 TTCAAGGATT TTGCCAAGAC AATGGTCGAC TTTATAGCCG AATATCTGGA GAATATACGC
1141 GAAAGgtgag ccagattaag actccctact caattagctt gaattaaact taatattagc
1201 tatgaatttc atttatatgg taccagaatc agtcgcttga cctcagcatt ttacgttcga
1261 atcgaagatt cgttctgctc gattcgaatc cccgggcaag tgaatgacat ttcgcacag
1321 ttttgagatt agtcacggga aagtgcgacc gatcggacat ttccattgct atatatatc
1381 atatatatat atcattttgt ttagggggtt gaggcgacct tcccattagc tcgagggcca
1441 agtactttcg ctgctcttgg gccgaaaact aattaattaa atggctttgt tgagttggcg
1501 tgtcaaggtc gtttttcatg tatacgagta tagatataat tgcactgcta acgccttggc
1561 caaaagcaat tcgggtatct cactattctt gggcaattct tctaacggct tcggtttccat
1621 taccttgaaa atcaaagtca gctaagtaaa caattttctt actacagctg ctgagtttgt
1681 CAAGATTCG GAGCTGCGG aaattaatgg ttaattgaaa atcaagctta agtagagcgt
1741 aatataataa ttcattttgc tttattaaag ttccctcgac attgaagttt caaaactatt
1801 ttcttagtta gataactttt taaacgaatc tttgttaatt gaagatacat atatatagag
1861 aaattatctt tttatttctt tttttcactt cttagtagta ctctctttaa attgaaagga
1921 tagaaaatcc caccatcatt atcagcattg cctctctatc tatattctgt tcccatagca
1981 atttgctaca tattcgtatt gattttcatg gcagtggtgca caagttgggg gtggttggat
2041 ggggtgcctt caacccaat gattcctgat gcctttgttg gctaactgag tttcgcagcc
2101 aattagcaag gagcttttac tgaatgggag ccaaaatgca atcagaagct aacgcaattt
2161 tcgcaattac agGCGGTTT TGCCGGAAGT GAAGCCTGGC TACCTGAAGC CATTGATTCC
2221 GGATGCTGCG CCCGAGAAGC CGGAGAAGTG GCAGGATGTG ATGCAGGACA TCGAGCGAGT
2281 CATCATGCCG GCGGTGACAC ACTGGCACAG TCCCAAGTTT CATGCCTACT TCCCCACGGC
2341 CAACTCGTAT CCAGCGATCG TTGCGGACAT GCTGAGTGGG GCGATTGCCT GCATCGGATT
2401 CACGTGGATC GCCAGTCCC GGTGCACGGA ACTCGAGGTG GTCATGATGG ATTTGGCTGGG
2461 CAAGATTCG GAGCTGCGG CAGAGTTCTT GGCTGTTCG GCGGCAAGG GTGGCCTGGT
2521 CATCCAGGGC ACGGCCAGTG AGTCCACACT GGTGGCTCTG CTGGGAGCCA AGGCCAAGAA
2581 GTTGAAGGAG GTGAAGGAGC TCCATCCGGA GTGGGATGAG CACACCATCT TGGGCAAGTT
2641 GGTGGGCTAC TGCTCGGACC AGGCTCACTC ATCCGTGGAG CGGGCTGGTC TTCTGGGCGG
2701 AGTAAAGCTC CGTTCCGTGC AGTCCGAGAA TCACAGAATG CGTGGTGCTG CCCTGGAAAA
2761 GGCCATCGAA CAGGATGTGG CCGAGGGTTT GATTCCCTTC TACGCGGTGG TCACCCTGGG
2821 CACCACCAAC TCCTGCGCTT TCGACTACTT GGATGAGTGT GGACCGGTGG GAAACAAGCA
2881 CAATTTGTGG ATCCATGTGG ACCTGCTTCA TGCCGGATCC GCTTTCAATT GCCCGAGTA
2941 TCGCCACCTG ATGAAGGGCA TCGAATCAGC AGACTCTTTC AATTTCAATC CACACAAATG
3001 GATGCTGGTG AACTTTGACT GCTCGCCAT GTGGCTGAAG GATCCAGTT GGGTGGTCAA
3061 CGGTTCAAT GTGGACCCTC TTTACCTGAA GCACGACATG CAGGGATCAG CTCCGGACTA
3121 TCGTCACTGG CAAATCCAC TTTGACGGCG ATTCAGGGCA CTGAAGCTCT GGTTCGTCTT
3181 CCGGCTGTAC GGTGTCGAGA ATCTCCAGGC CCACATCCGC AGACACTGCA ACTTTGCCAA
3241 GCGATTCCGG GATCTCTGCG TGGCGGACTC CAGATTTGAA CTGGCCGCCG AGATCAATAT
3301 GGGATTGGTC TGCTTCCGCG TGAAGGGCAG CAACGAGCGG AACGAAGCTC TTCTCAAGCT
3361 AATCAATGGA CGCGGCCACA TCCACTTGGT TCCCGCCAAG ATCAAGGATG TCTACTTCTT
3421 GCGCATGGCC ATTTGCTCGC GATTCACCCA GTCCGAGGAC ATGGAGTACT CGTGAAGGA

```

3481 GGTCAGCGCC GCTGCCGACG AGATGGAACA GGAGCAGTAA AGTGGTTGTG CAGGTCTGTT  
3541 CCGTGTTTAG TATATAAATT AATATAGTAA ACTTAAATTG GACCAGTATG ATATATAATG  
3601 CATTGTGACT TGGAACCCGG AACAGACCAT ACACTTTCCA CTTGCGACAT GTTTAGGGAA  
3661 TTTACATCGC AACAAAAGAT GGTTCGTCCA TCGCTACATT ATATTTATAG TATCCTATCA  
3721 TTGTATCATT GATGTTGTTT ATGATTTTTA TTGTTAACGT TATGCGCCTA ATTAAAACAA  
3781 ATGTATTCTG CTTAAAAATA CAAACGAATT GTAAC TATAA A
